# Supplementary material
Source: ML conference proceedings conference paper supplement (https://openaccess.thecvf.com/content/CVPR2023/html/Du_SuperDisco_Super-Class_Discovery_CVPR_2023_paper.html)
Supplement: Supplementary file 1 [file Du_SuperDisco_Super-Class_Discovery_CVPR_2023_supplemental.pdf]

# Supplement material: SuperDisco: Super-Class Discovery Improves Visual Recognition for the Long-Tail

Yingjun Du<sup>1</sup>, Jiayi Shen<sup>1</sup>, Xiantong Zhen<sup>1,2\*</sup>, Cees G. M. Snoek<sup>1</sup>

<sup>1</sup>AIM Lab, University of Amsterdam <sup>2</sup>Inception Institute of Artificial Intelligence

## 1. Effect of number of super-class levels on more datasets.

We experimented with *ImageNet-LT* [1] and *Places-LT* [1] with different number of super-class levels. The results are reported in Table 1 and Table 2, respectively. On the *ImageNet-LT* [1], we find that the performance of the super-class graphs with the different number of super-class levels is higher than the baseline. However, with more hierarchies (*i.e.* the last row), the performance on the few-shot classes is the highest, while (4, 8, 16, 32, 64) achieves the best performance on all classes. On the *Places-LT* [1], with more complex hierarchies *i.e.* (4, 8, 16, 32, 64, 128, 258) achieves the best performance on all classes and few-shot classes. We also conduct experiment on the *iNaturalist* [3] to analysis the effect of number of super-class levels in the Figure 1. We can find that with more hierarchies, the performance will consistently increase. 64 achieves the peak performance on the all classes and any-shot classes. For this experiment, we attribute this to our model’s ability to explore relatively balanced super-class spaces, thus making the refined tail category features discriminative. We conclude that deeper and broader graphs are needed to discover the super-classes in the case of severe class imbalance.

|                         | Many        | Medium      | Few         | All         |
|-------------------------|-------------|-------------|-------------|-------------|
| Baseline                | 57.1        | 45.2        | 29.3        | 47.7        |
| (2, 4, 8)               | 58.6        | 47.1        | 31.1        | 49.8        |
| (4, 8, 16)              | 59.8        | 48.3        | 33.2        | 50.1        |
| (4, 8, 16, 32)          | 61.3        | 49.7        | 35.1        | 52.9        |
| (8, 16, 32, 64)         | <b>66.5</b> | 49.8        | 36.1        | 55.1        |
| (4, 8, 16, 32, 64)      | 66.4        | <b>53.3</b> | 37.1        | <b>57.1</b> |
| (4, 8, 16, 32, 64, 128) | 66.1        | 52.3        | <b>37.9</b> | 56.5        |

Table 1. Effect of number of super-class levels on *ImageNet-LT*. Meta-SuperDisco achieves consistent performance gains with more complex hierarchies.

\*Currently with United Imaging Healthcare, Co., Ltd., China.

|                                   | Many        | Medium      | Few         | All         |
|-----------------------------------|-------------|-------------|-------------|-------------|
| Baseline                          | 40.6        | 39.1        | 28.6        | 37.6        |
| (2, 4, 8)                         | 43.1        | 39.1        | 29.9        | 37.5        |
| (4, 8, 16)                        | 44.2        | 39.9        | 30.3        | 38.1        |
| (4, 8, 16, 32)                    | <b>45.9</b> | 40.4        | 31.1        | 38.9        |
| (4, 8, 16, 32, 64)                | 44.9        | 41.3        | 32.3        | 39.2        |
| (4, 8, 16, 32, 64, 128)           | 44.3        | <b>43.1</b> | 34.5        | 39.9        |
| (4, 8, 16, 32, 64, 128, 256)      | 45.3        | 42.8        | <b>35.3</b> | <b>40.3</b> |
| (4, 8, 16, 32, 64, 128, 256, 512) | 44.1        | 42.3        | 34.0        | <b>39.1</b> |

Table 2. Effect of number of super-class levels on *Places-LT*. Meta-SuperDisco achieves consistent performance gains with more complex hierarchies.

## 2. Benefit of SuperDisco and Meta-SuperDisco

We also give the ablation to show the benefit of SuperDisco and Meta-SuperDisco on *ImageNet-LT/Places-LT/iNaturalist* in Table 3. The Meta-SuperDisco consistently surpasses the SuperDisco for all shots. The consistent improvements confirm that Meta-SuperDisco learns even more robust super-class graphs, leading to a discriminative representation of the tail data.

## 3. Computation cost

We report the computation cost and accuracy gain ablation in Table 4 for *ImageNet-LT*. Although our model requires more parameters and computational costs compared to the baseline, it brings a 7.2% improvement in accuracy. Compared to the state-of-the-art method by Park *et al.* [2], our model requires a considerably lower amount of additional parameters and computational cost while still delivering better results.

## 4. Evaluation protocol

We evaluate our model on the test sets for each dataset and report commonly used top-1 accuracy over all classes. For the CIFAR-100-LT dataset, we report the accuracy with different imbalance factors. For the *ImageNet-LT*, *Places-LT*, and *iNaturalist*, we follow [1] and further report accuracy on three different splits of the set of classes: *Many-shot* (>100

|                 | <i>ImageNet-LT</i> |        |      |      | <i>Places-LT</i> |        |      |      | <i>iNaturalist</i> |        |      |      |
|-----------------|--------------------|--------|------|------|------------------|--------|------|------|--------------------|--------|------|------|
|                 | Many               | Medium | Few  | All  | Many             | Medium | Few  | All  | Many               | Medium | Few  | All  |
| Baseline        | 58.4               | 49.3   | 34.8 | 52.7 | 42.1             | 39.2   | 30.9 | 36.3 | 68.3               | 69.2   | 67.1 | 68.5 |
| SuperDisco      | 65.1               | 52.1   | 35.9 | 55.9 | 44.7             | 41.1   | 34.2 | 39.2 | 71.3               | 71.0   | 69.6 | 72.1 |
| Meta-SuperDisco | 66.1               | 53.3   | 37.1 | 57.1 | 45.3             | 42.8   | 35.3 | 40.3 | 72.3               | 72.9   | 71.3 | 73.6 |

Table 3. **Benefit of SuperDisco and Meta-SuperDisco.** SuperDisco achieves better performance compared to a baseline fine-tuning on all shots, while Meta-SuperDisco is even better for long-tailed recognition.

Table 4. **Computation cost and accuracy gain** for SuperDisco on ImageNet-LT compared to the baseline and state-of-the-art. SuperDisco provides a good trade off.

| Models          | Added computational cost |                | Accuracy |
|-----------------|--------------------------|----------------|----------|
|                 | FLOPs (M)                | Parameters (M) |          |
| ResNet-32       | 0                        | 0              | 45.3     |
| Baseline        | 0.04                     | 0.001          | 49.9     |
| Park et al [2]  | 0.41                     | 0.35           | 56.2     |
| SuperDisco      | 0.15                     | 0.03           | 56.4     |
| Meta-SuperDisco | 0.28                     | 0.08           | 57.1     |

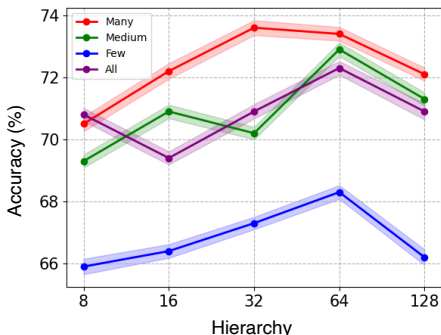

Figure 1. **Effect of number of super-class levels** on iNaturalis-LT.

images), *Medium-shot* (20-100 images) and *Few-shot* (<20 images). We report the average top-1 classification accuracy across all test images.

## 5. Algorithm

We give the detailed algorithms of SuperDisco and Meta-SuperDisco in Alg. 1 and Alg. 2, respectively.

## References

- [1] Ziwei Liu, Zhongqi Miao, Xiaohang Zhan, Jiayun Wang, Boqing Gong, and Stella X Yu. Large-scale long-tailed recognition in an open world. In *CVPR*, pages 2537–2546, 2019. 1
- [2] Seulki Park, Youngkyu Hong, Byeongho Heo, Sangdoon Yun, and Jin Young Choi. The majority can help the minority: Context-rich minority oversampling for long-tailed classification. In *Proceedings of the IEEE/CVF Conference on Computer Vision and Pattern Recognition*, pages 6887–6896, 2022. 1, 2

- [3] Grant Van Horn, Oisin Mac Aodha, Yang Song, Yin Cui, Chen Sun, Alex Shepard, Hartwig Adam, Pietro Perona, and Serge Belongie. The inaturalist species classification and detection dataset. In *CVPR*, pages 8769–8778, 2018. 1

---

**Algorithm 1** SuperDisco

---

**Require:** Training data:  $\{x_k, y_k\}$ ; Number of super-class levels:  $l$ ; Number of vertices in the  $l$ -th super-class level:  $C^l$ ; Feature extractor:  $f_\theta(\cdot)$ ; Graph function:  $g_\phi(\cdot)$ ; Classifier function:  $h_\psi(\cdot)$ ; Learning rate:  $\alpha$ .

- 1: Randomly initialize all learnable parameters  $\Phi = \{\theta, \phi, \psi\}$
  - 2: **while** not done **do**
  - 3:   Sample a batch of samples  $\{x_i, y_i\}$
  - 4:   Compute the original feature:  $\mathbf{z} = f_\theta(x)$
  - 5:   Construct the super-class graph  $\mathcal{C}^l$  by computing the super-class vertex  $\mathbf{H}_{\mathcal{C}^l}^l$  and weights  $\mathbf{A}_{\mathcal{C}^l}^l$  based on the Eq. (1)
  - 6:   Construct the graph  $\mathcal{R}$  and compute the weight  $A_{\mathcal{R}}^l$  based on the Eq. (2)
  - 7:   **for**  $m$  in the number of layers of GNN **do**
  - 8:     Apply GNN on the graph  $\mathcal{R}$  by message passing and obtain the representations  $\mathbf{H}_{\mathcal{R}}^{(m+1)}$  based on the Eq. (3)
  - 9:   **end for**
  - 10:   Get the refined feature  $\mathbf{z}^l = \mathbf{H}_{\mathcal{R}}^{(m+1)}[0]$
  - 11:   Compute the final prediction  $\tilde{y} = h(\mathbf{z}^l)$
  - 12:   Update  $\Phi = \Phi - \alpha \nabla_{\Phi} \sum_{i=1}^I \mathcal{L}_{\text{CE}}(\tilde{y}_i, y_i)$
  - 13: **end while**
- 

---

**Algorithm 2** Meta-SuperDisco

---

**Require:** Training data:  $\{x_k, y_k\}$ ; Balanced data:  $\mathcal{M}$ ; Number of super-class levels:  $l$ ; Number of vertices in the  $l$ -th super-class level:  $C^l$ ; Feature extractor:  $f_\theta(\cdot)$ ; Graph function:  $g_\phi(\cdot)$ ; Classifier function:  $h_\psi(\cdot)$ ; Learning rate:  $\alpha$ .

- 1: Randomly initialize all learnable parameters  $\Phi = \{\theta, \phi, \psi\}$
  - 2: **while** not done **do**
  - 3:   Sample a batch of samples  $\{x_i, y_i\}$
  - 4:   Compute the original feature:  $\mathbf{z} = f_\theta(x)$
  - 5:   Construct the super-class graph  $\mathcal{C}^l$  by computing the super-class vertex  $\mathbf{H}_{\mathcal{C}^l}^l$  and weights  $\mathbf{A}_{\mathcal{C}^l}^l$  based on the Eq. (1)
  - 6:   Construct the prototype graph  $\mathcal{P}$  by computing the prototype vertex  $\mathbf{C}_{\mathcal{P}}$  and weights  $\mathbf{A}_{\mathcal{P}}$  based on the Eq. (4)
  - 7:   Construct the graph  $\mathcal{R}$  and compute the weight  $A_{\mathcal{R}}^l$  based on the Eq. (2)
  - 8:   Construct the super graph  $\mathcal{S}$  and compute the vertices  $\mathbf{C}_{\mathcal{P}}^l$  and weight  $\mathbf{H}_{\mathcal{C}^l}^l$  based on the Eq. (5)
  - 9:   **for**  $m$  in the number of layers of GNN **do**
  - 10:     Apply GNN on the graph  $\mathcal{S}$  by message passing and obtain the representations  $\mathbf{M}^{(m+1)}$  based on the Eq. (6)
  - 11:   **end for**
  - 12:   Get the refined feature  $\mathbf{z}^l = \mathbf{M}^{(m+1)}[0]$
  - 13:   Compute the final prediction  $\tilde{y} = h(\mathbf{z}^l)$
  - 14:   Update  $\Phi = \Phi - \alpha \nabla_{\Phi} \sum_{i=1}^I \mathcal{L}_{\text{CE}}(\tilde{y}_i, y_i)$
  - 15: **end while**
-
